# Supplementary material for: Growth of β-glycine crystals promoted by standing surface acoustic waves (SSAWs)
Source: Royal Society of Chemistry journal article supplement (doi:10.1039/c7ce02038d), 2018-01-01
Supplement: c7ce02038d1.pdf [file c7ce02038d1.pdf]

## Electronic Supplementary Information

### Growth of $\beta$ -glycine crystals promoted by standing surface acoustic waves (SSAWs)

Cheng Bai, Chaohui Wang \*, Tengfei Zheng, Qiao Hu

\*State Key Laboratory for Manufacturing Systems Engineering, Xi'an Jiaotong University, Xi'an 710049, People's Republic of China.

Corresponding author E-mail: [chhw@mail.xjtu.edu.cn](mailto:chhw@mail.xjtu.edu.cn)

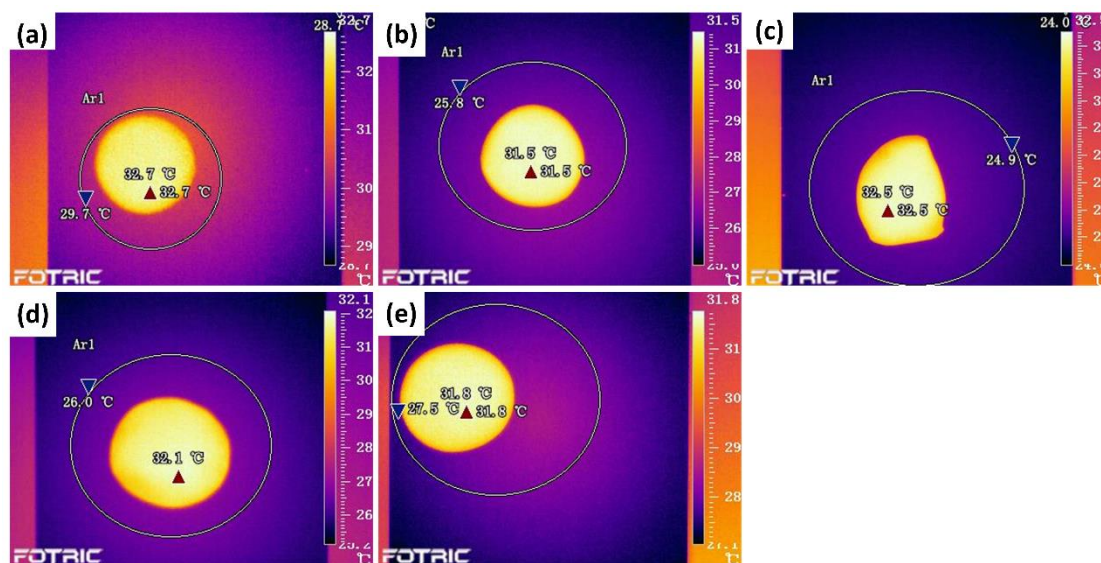

**Fig. S1** Infrared thermograms of droplet influenced by SSAWs with different frequencies: (a)6.0MHz, (b)9.3MHz, (c)12.3MHz, (d)15.4MHz, (e)18.2MHz. (with the input power 10Vpp)

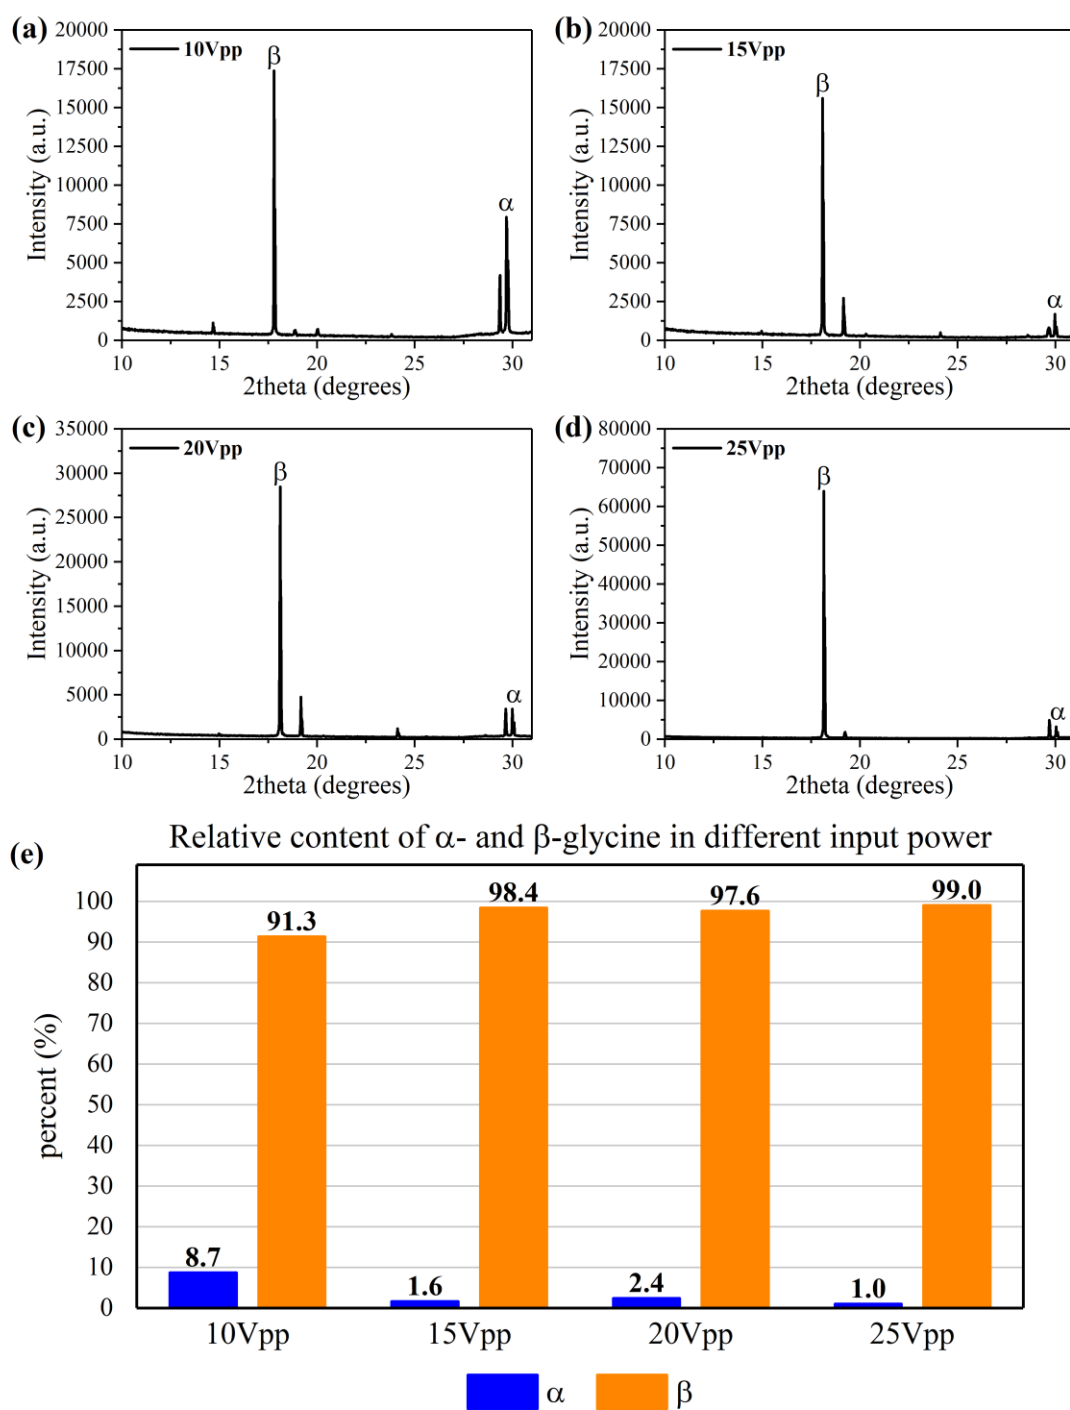

**Fig. S2** Powder X-ray diffraction patterns of different glycine samples which induced by 18.2MHz SSAWs with different input power: (a)10Vpp, (b)15Vpp, (c)20Vpp, (d)25Vpp. (e) Relative content of α-phase and β-phase in glycine crystal samples induced by 18.2MHz SSAWs with different input power.
